# Supplementary figures and images for: Highly selective recovery of phosphopeptides using trypsin-assisted digestion of precipitated lanthanide–phosphoprotein complexes
Source: Royal Society of Chemistry journal article supplement (doi:10.1039/c3an00066d), 2013-01-01

**CeCl<sub>3</sub>**

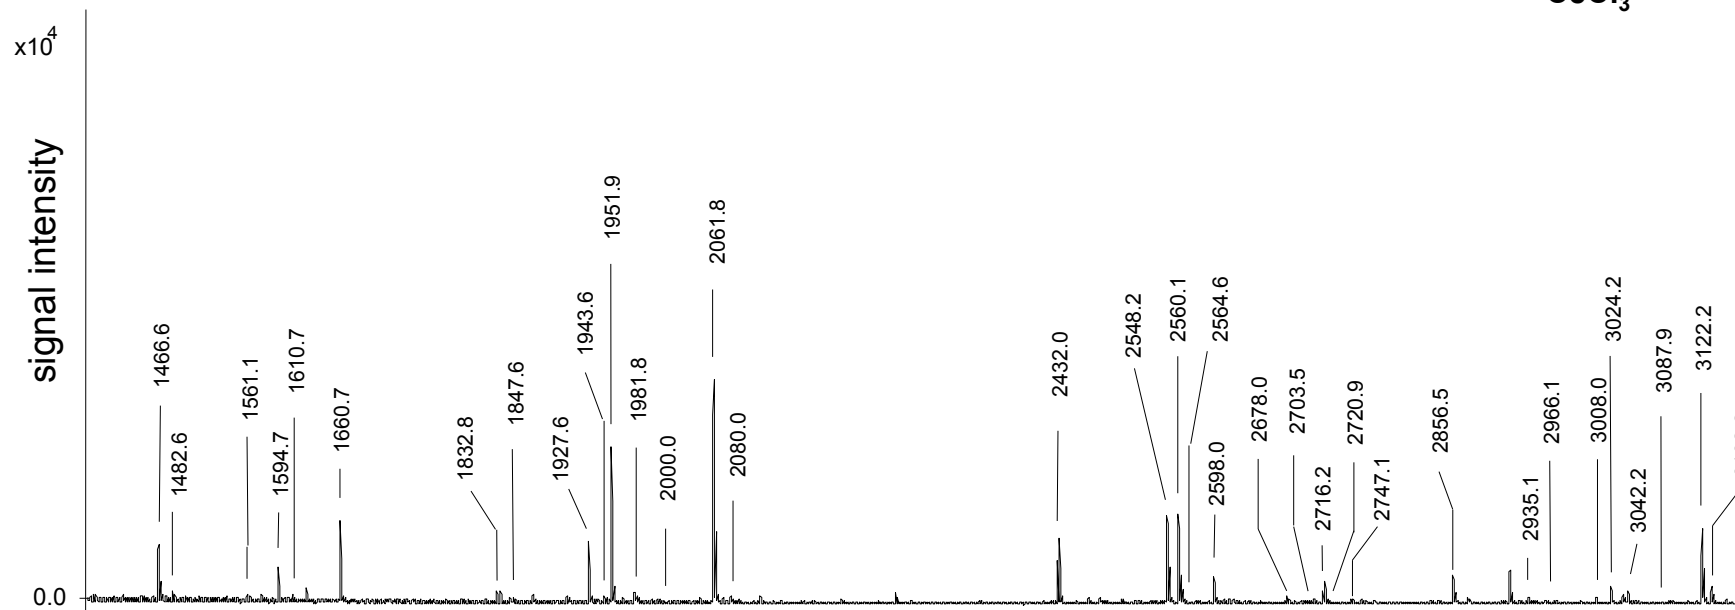

**TiO<sub>2</sub>**

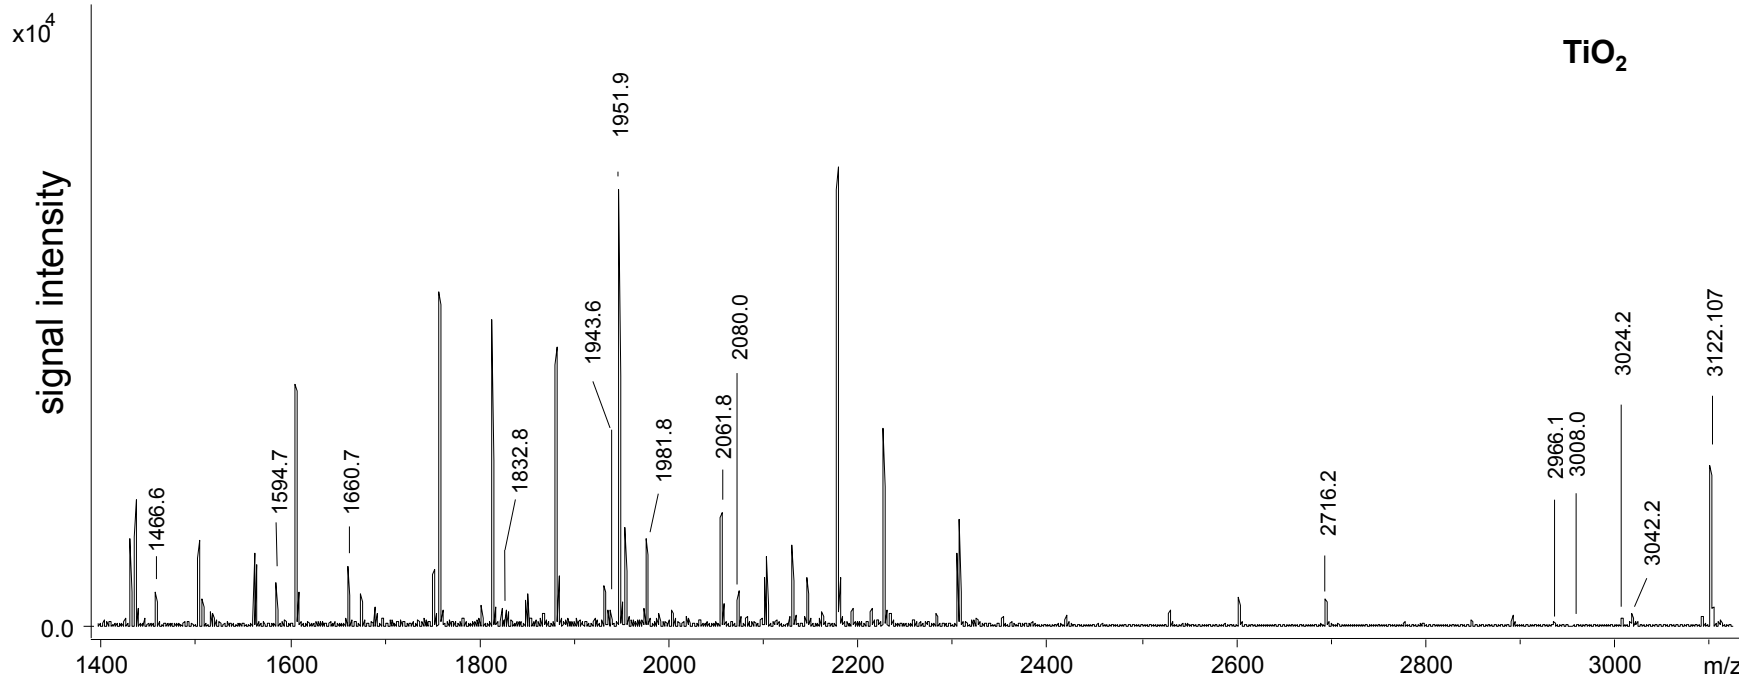

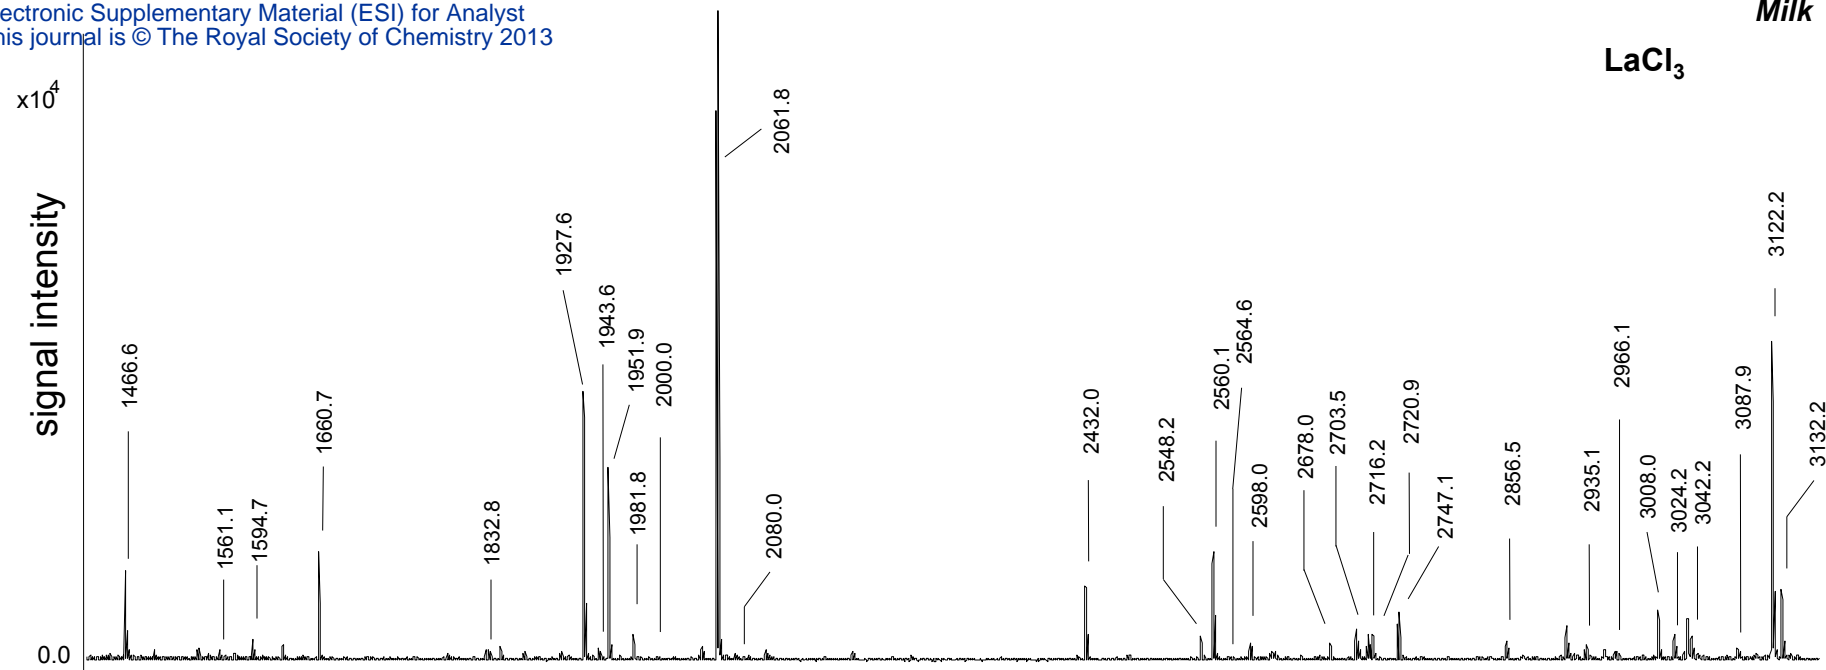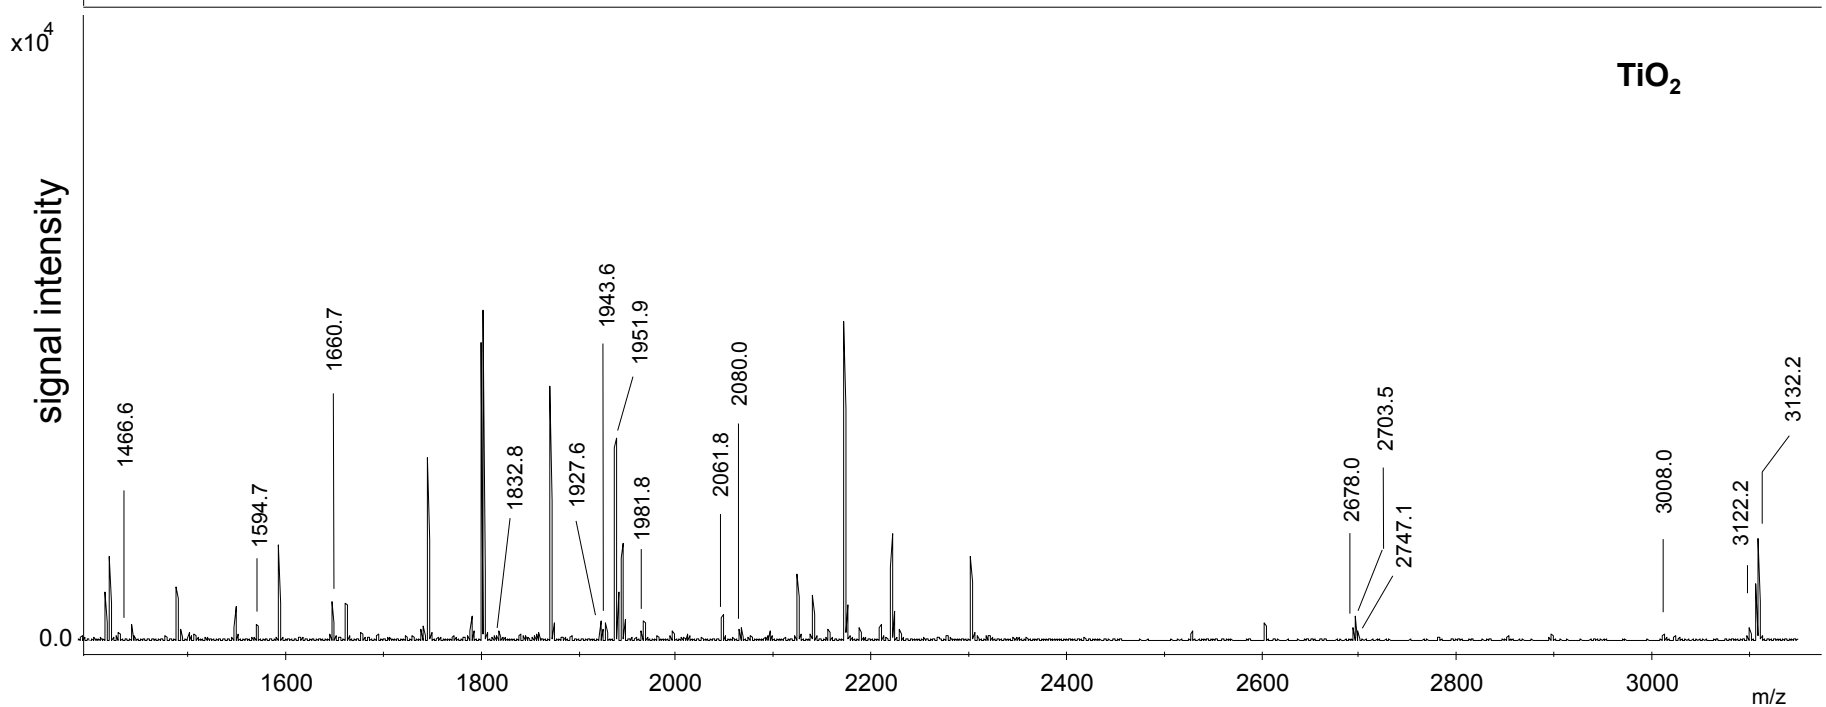

Supplement: c3an00066d.pdf [file c3an00066d.pdf]
